# Supplementary material for: Integrative modeling reveals the molecular architecture of the intraflagellar transport A (IFT-A) complex
Source: eLife journal article supplement (doi:10.7554/elife.81977), 2022-11-08

# Gathering data into spatial restraints

## Chemical crosslinking

98 DSSO crosslinks

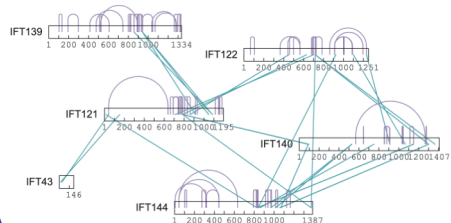

## AlphaFold predicted interfaces

7 predicted interfaces

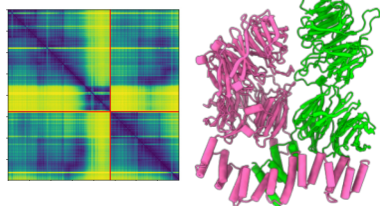

## AlphaFold predicted structures

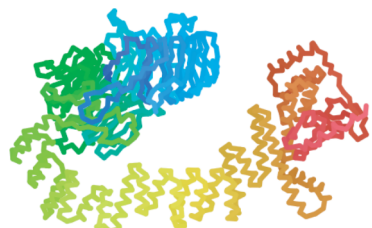

## Steric effects

Excluded volume restraint

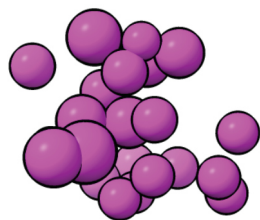

## Sequence connectivity

Sequence connectivity restraint

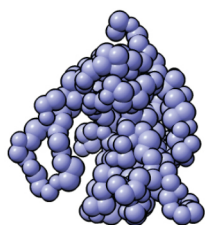

## Optimized sampling

### Initial random

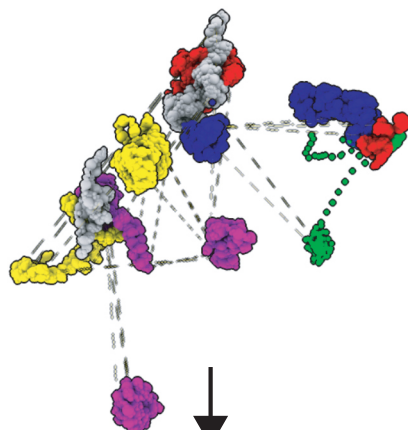

### Sampling

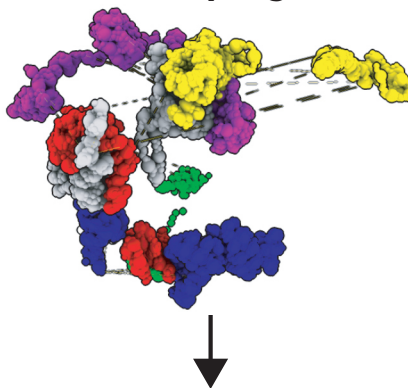

### Ensemble of models

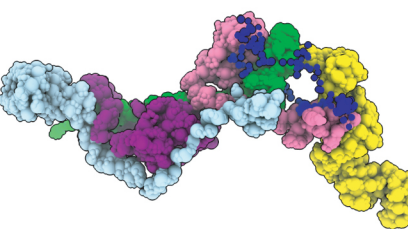

## Ensemble analysis

### Initial clustering and selection

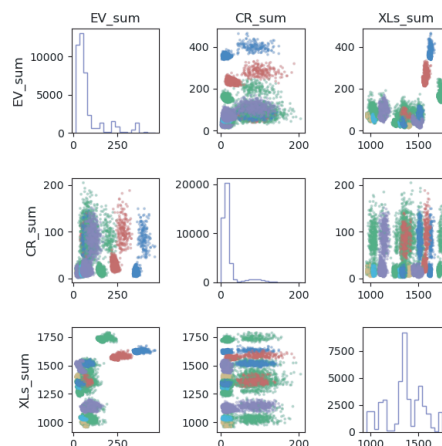

### Sampling exhaustiveness

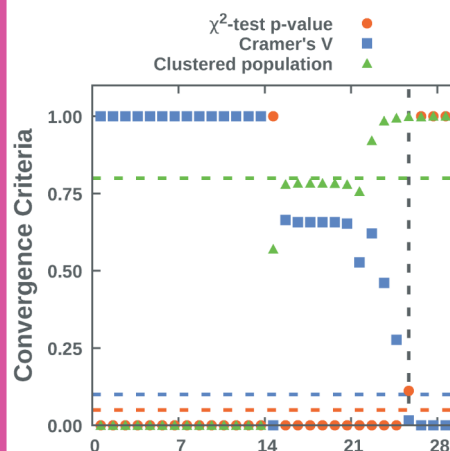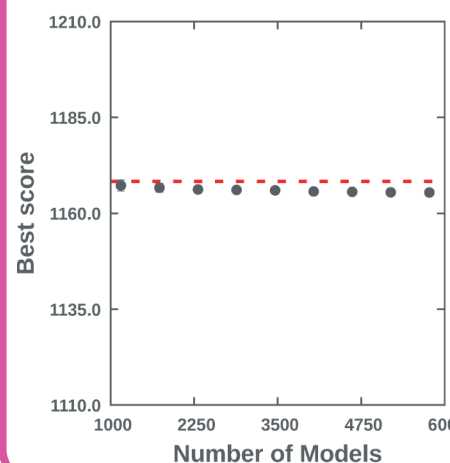

## Ensemble validation

### Localized probability densities

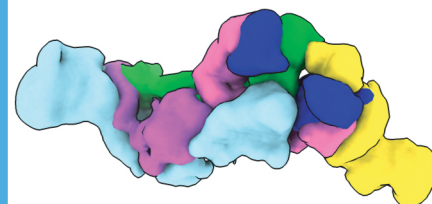

### Validation with data used for modeling

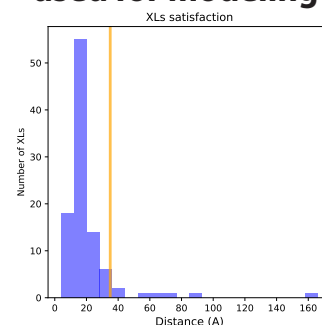

### Validation with data from literature

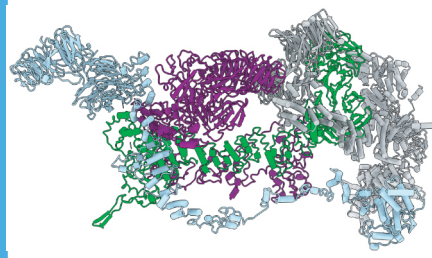

Supplement: supp [file elife-81977-supp-v1.zip › elife_poa_e81977_Figure_2_figure_supplement_3.pdf]
