# Supplementary material for: Integrative modeling reveals the molecular architecture of the intraflagellar transport A (IFT-A) complex
Source: eLife journal article supplement (doi:10.7554/elife.81977), 2022-11-08
Supplement: supp [file elife-81977-supp-v1.zip]

Archive with 11 entries (11 files):
- elife_poa_e81977_Figure_1_figure_supplement_1.pdf
- elife_poa_e81977_Figure_1_figure_supplement_2.pdf
- elife_poa_e81977_Figure_1_figure_supplement_3.pdf
- elife_poa_e81977_Figure_2_figure_supplement_1.pdf
- elife_poa_e81977_Figure_2_figure_supplement_2.pdf
- elife_poa_e81977_Figure_2_figure_supplement_3.pdf
- elife_poa_e81977_Figure_2_figure_supplement_4.pdf
- elife_poa_e81977_Figure_4_figure_supplement_1.pdf
- elife_poa_e81977_Figure_4_figure_supplement_2.pdf
- elife_poa_e81977_Figure_6_figure_supplement_1.pdf
- elife_poa_e81977_Figure_4_video_1.mp4
