# Supplementary figures and images for: Integrative modeling reveals the molecular architecture of the intraflagellar transport A (IFT-A) complex
Source: eLife journal article supplement (doi:10.7554/elife.81977), 2022-11-08

IFT43

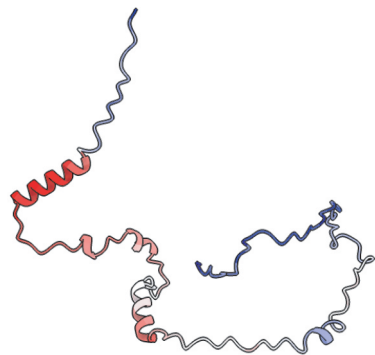

IFT121

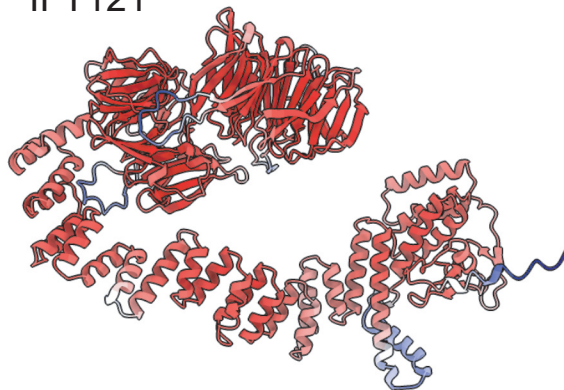

IFT122

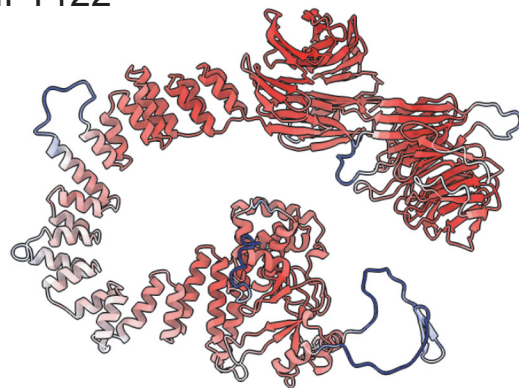

IFT139

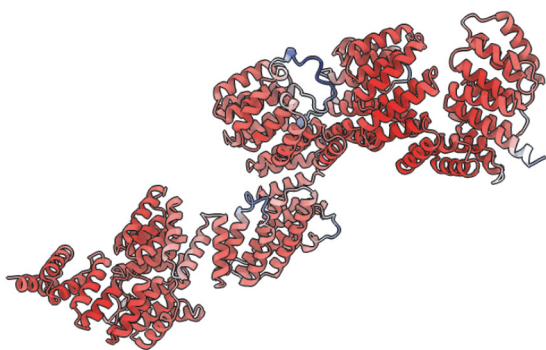

IFT140

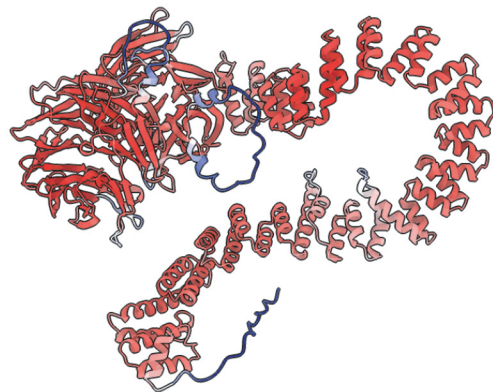

IFT144

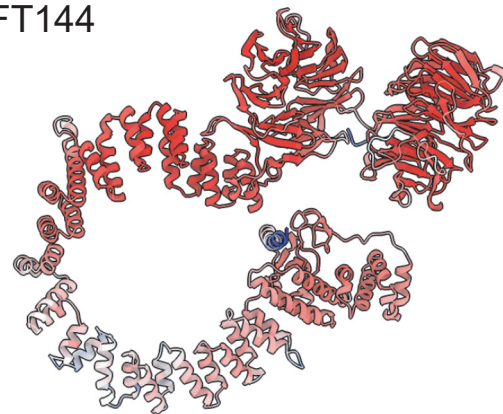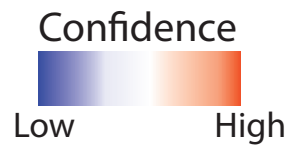

Supplement: supp [file elife-81977-supp-v1.zip]

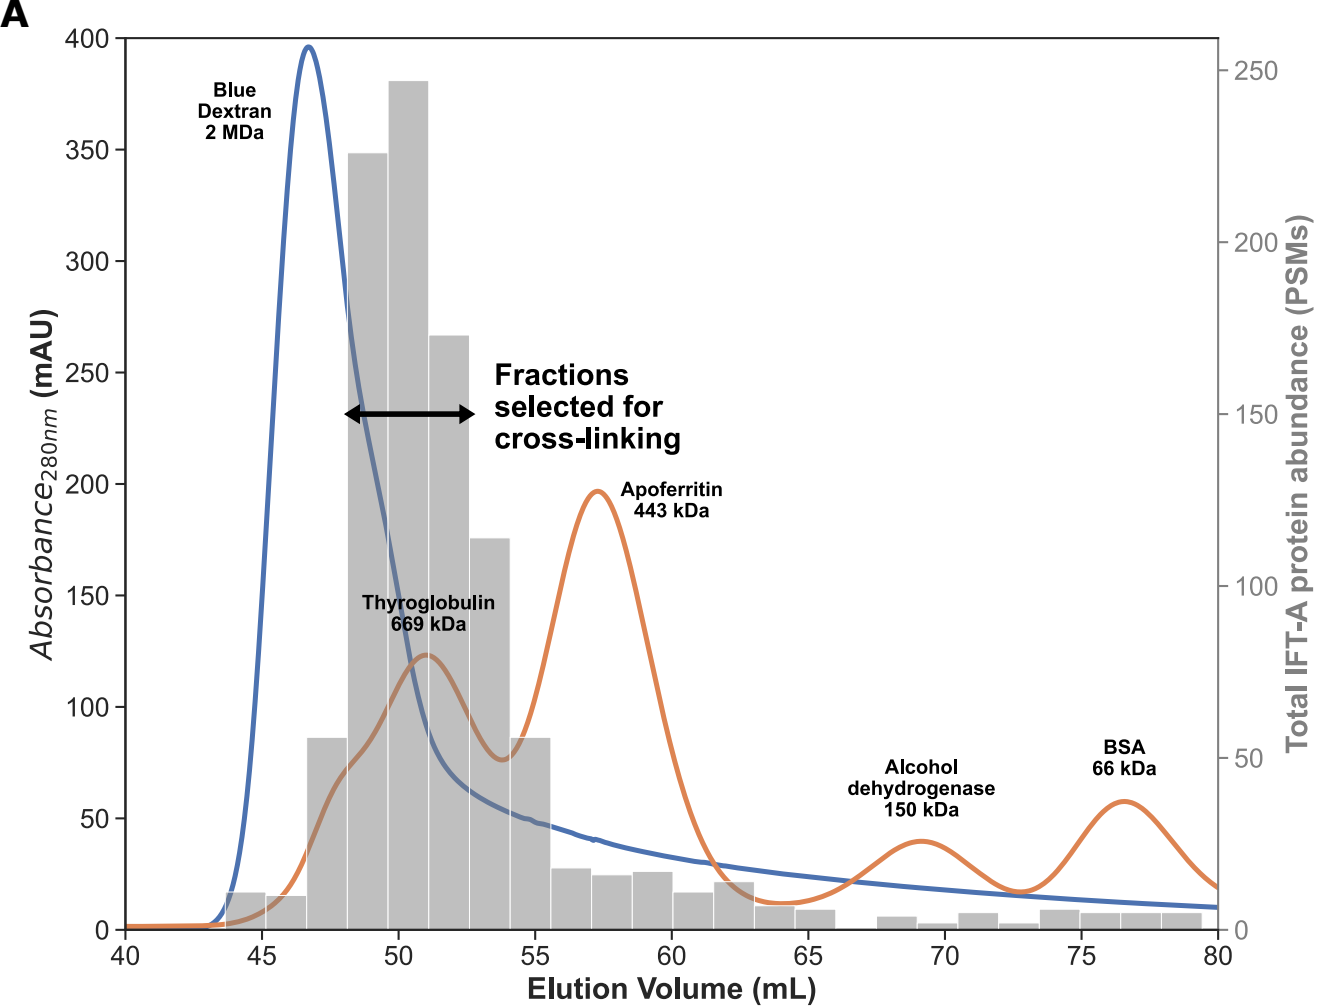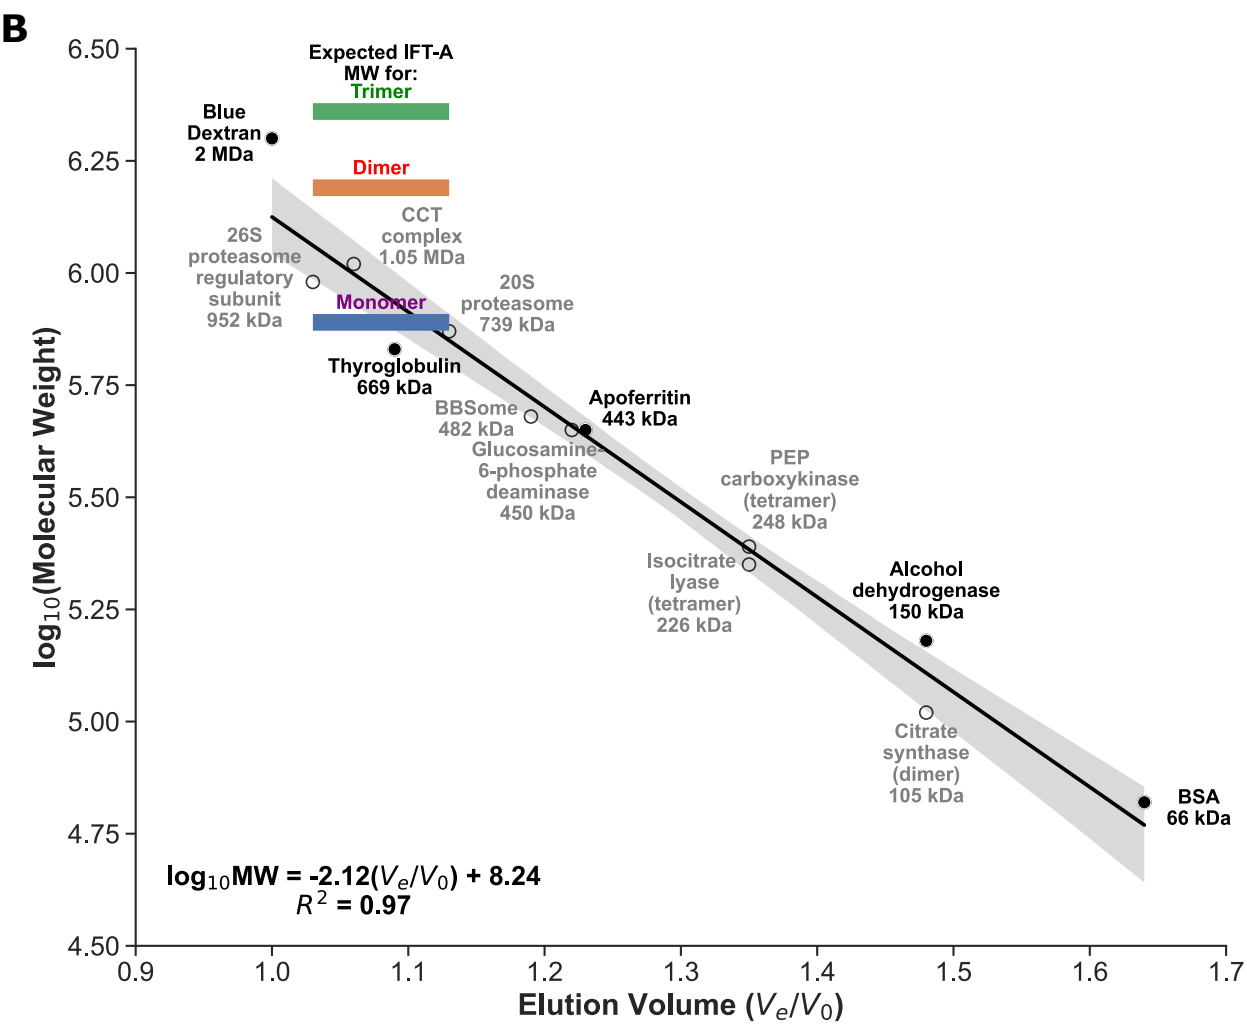

Supplement: supp [file elife-81977-supp-v1.zip › elife_poa_e81977_Figure_1_figure_supplement_2.pdf]

**A**

— *T. thermophila*  
— *C. reinhardtii*  
— Human

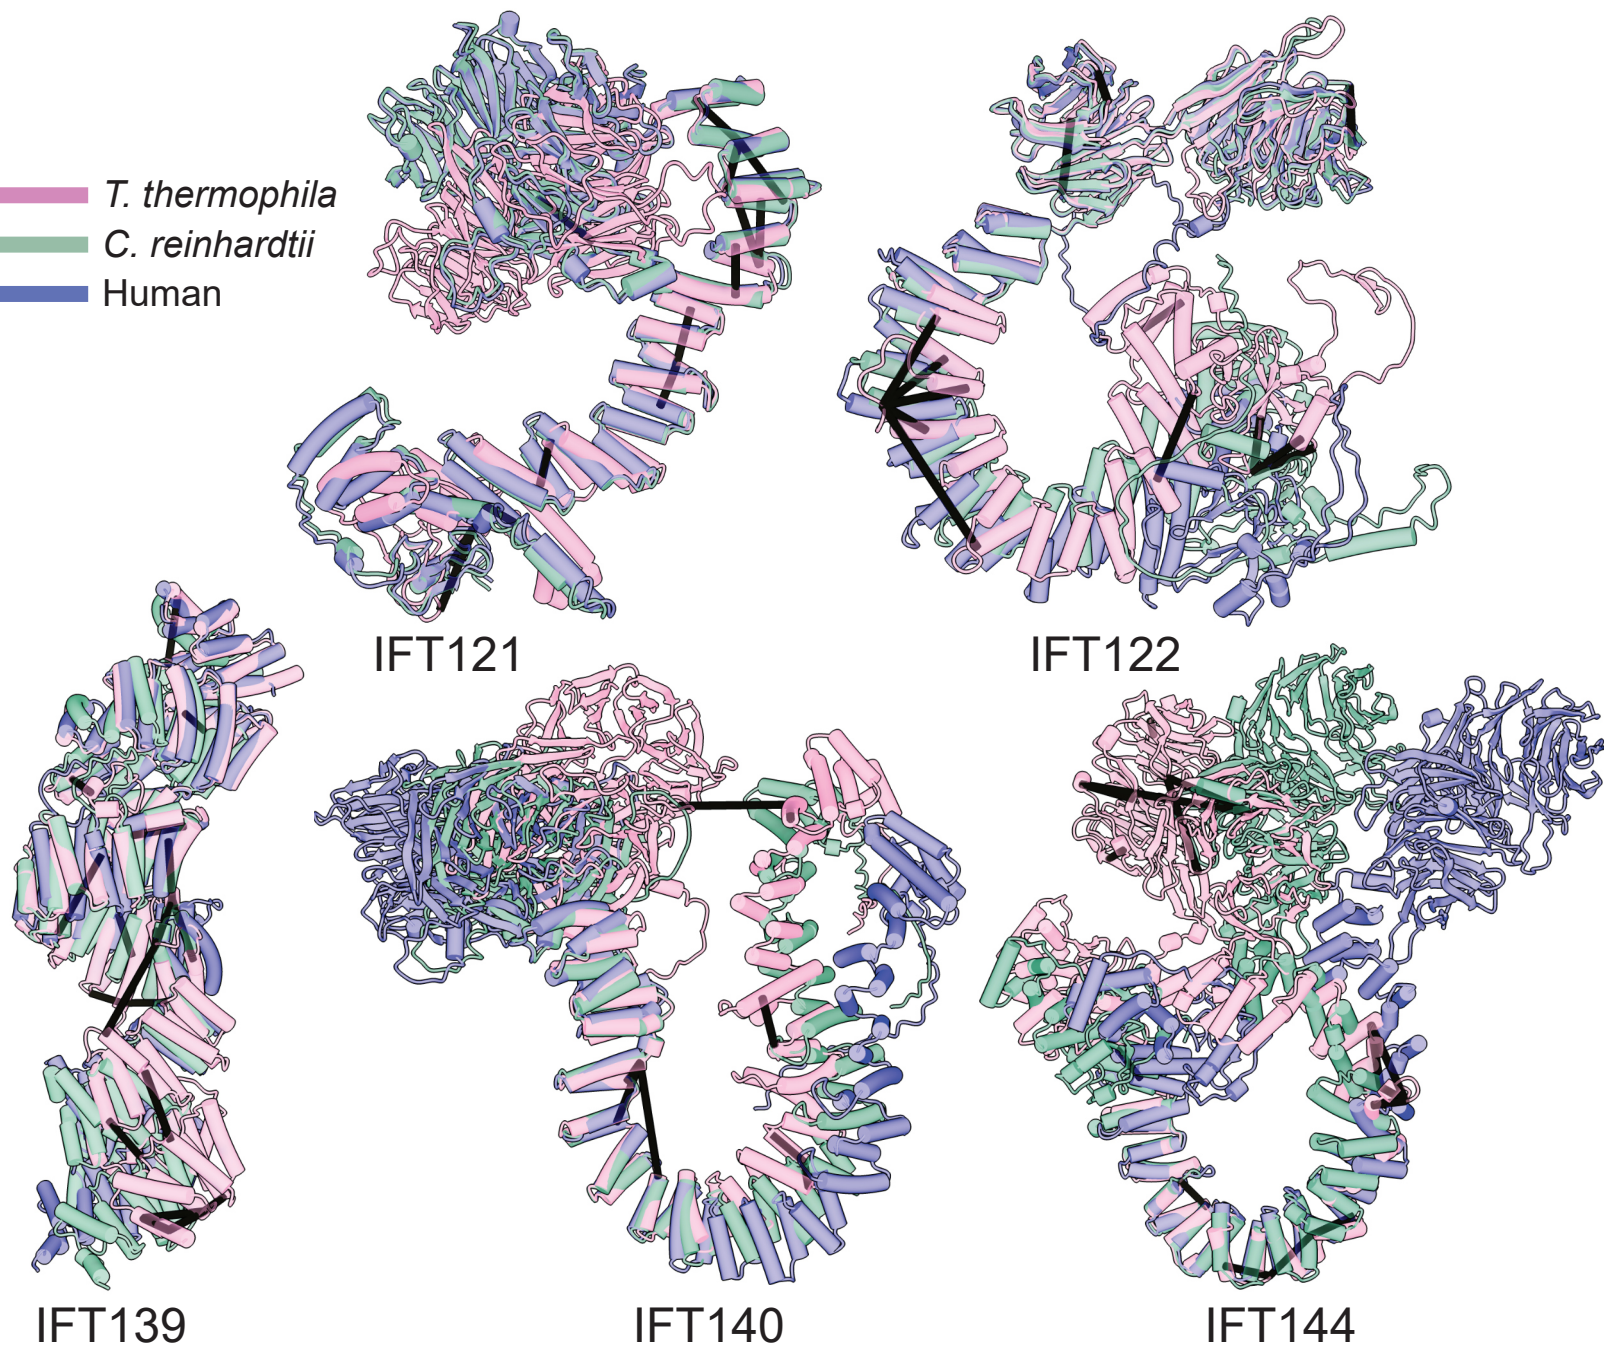**B**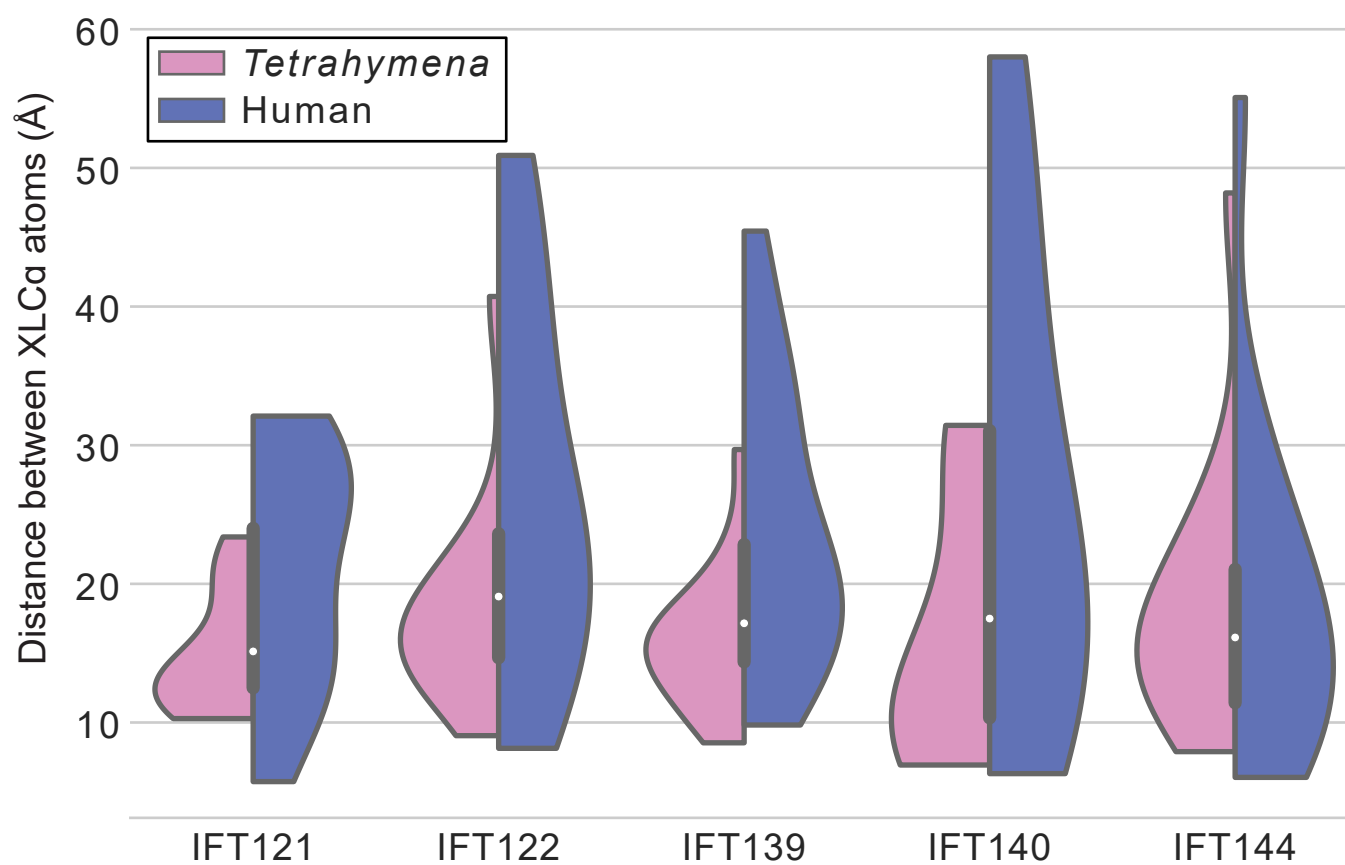

Supplement: supp [file elife-81977-supp-v1.zip › elife_poa_e81977_Figure_1_figure_supplement_3.pdf]

## Large interaction predicted, modeled as rigid body

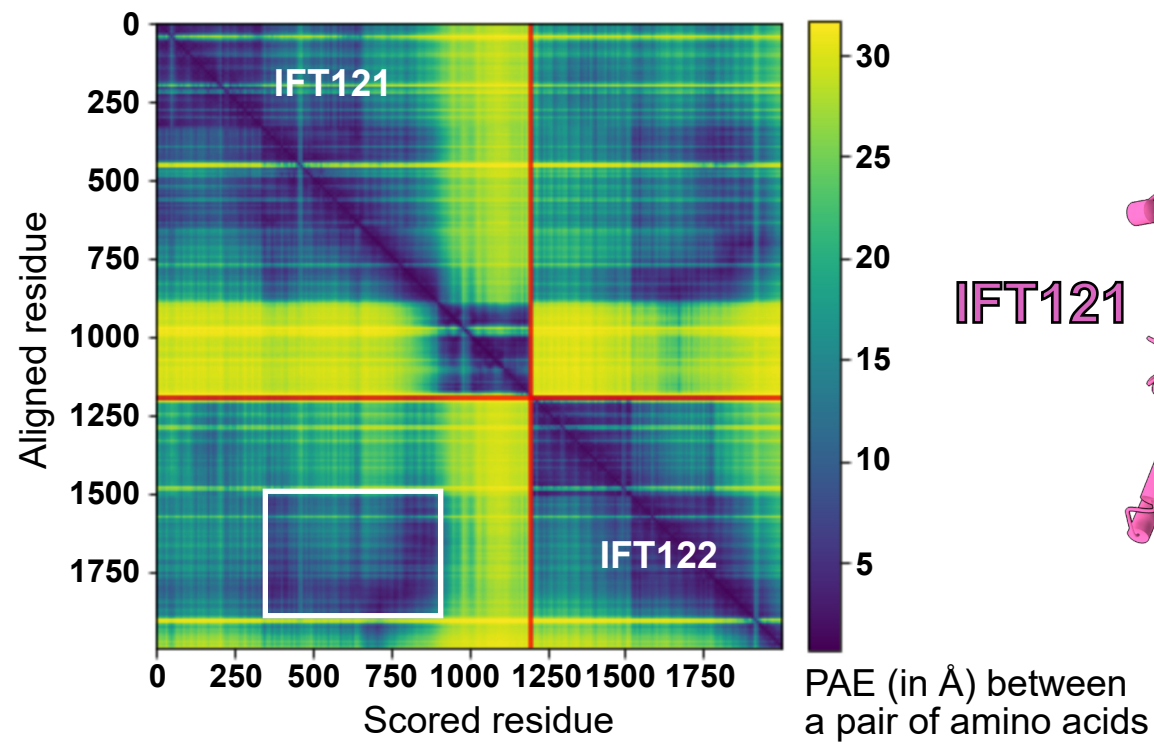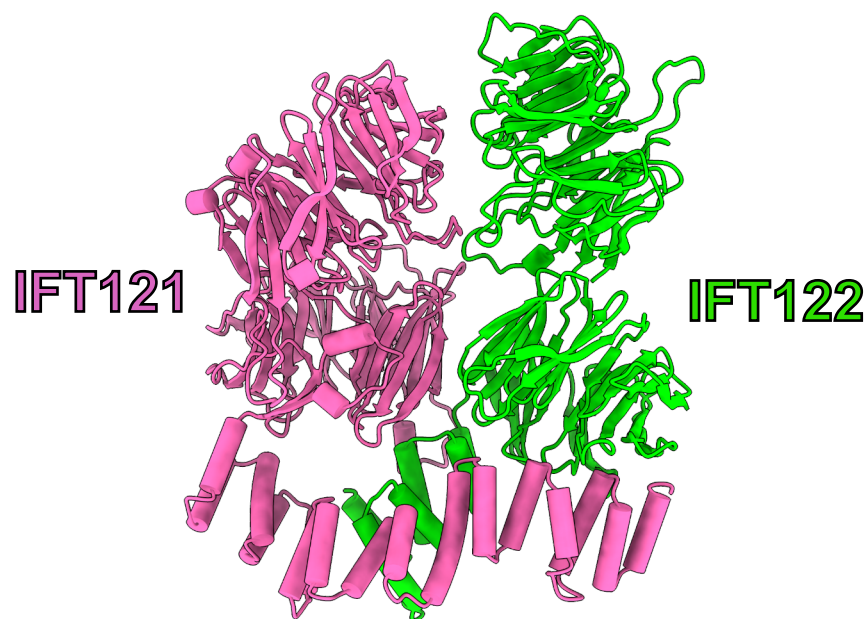

## No interaction predicted

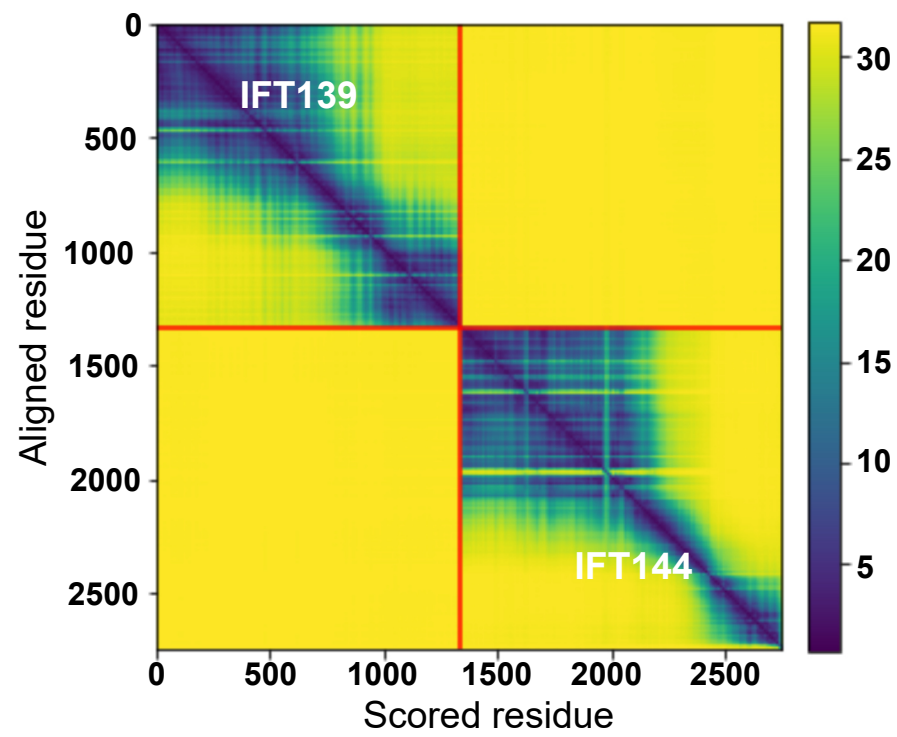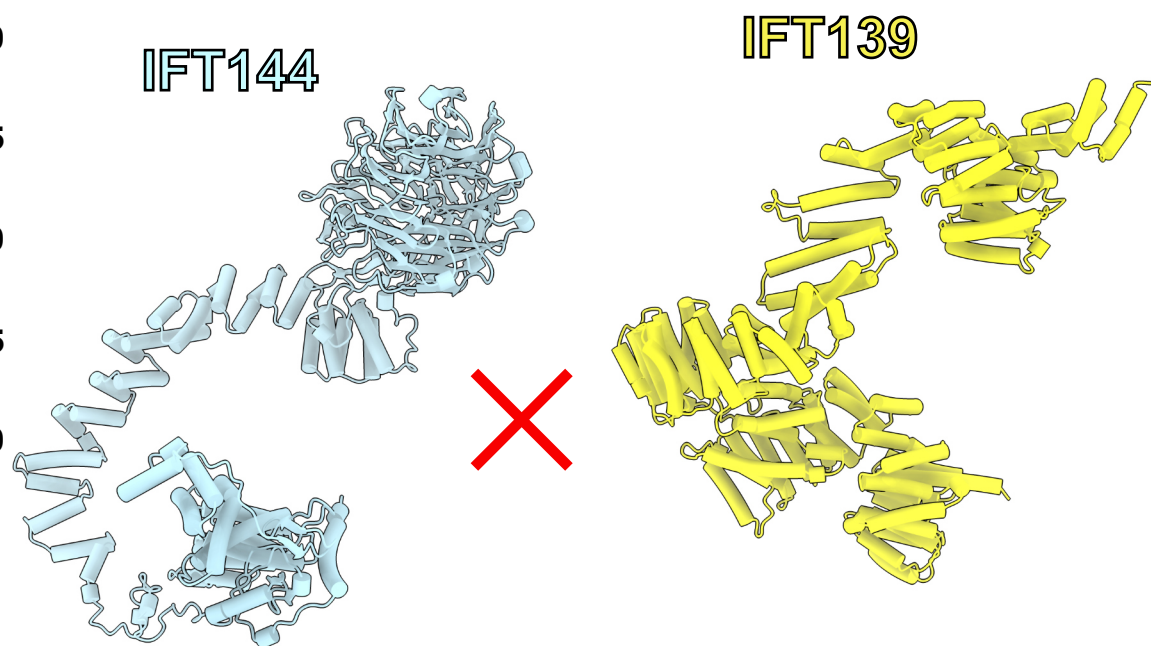

Supplement: supp [file elife-81977-supp-v1.zip › elife_poa_e81977_Figure_2_figure_supplement_1.pdf]

**A**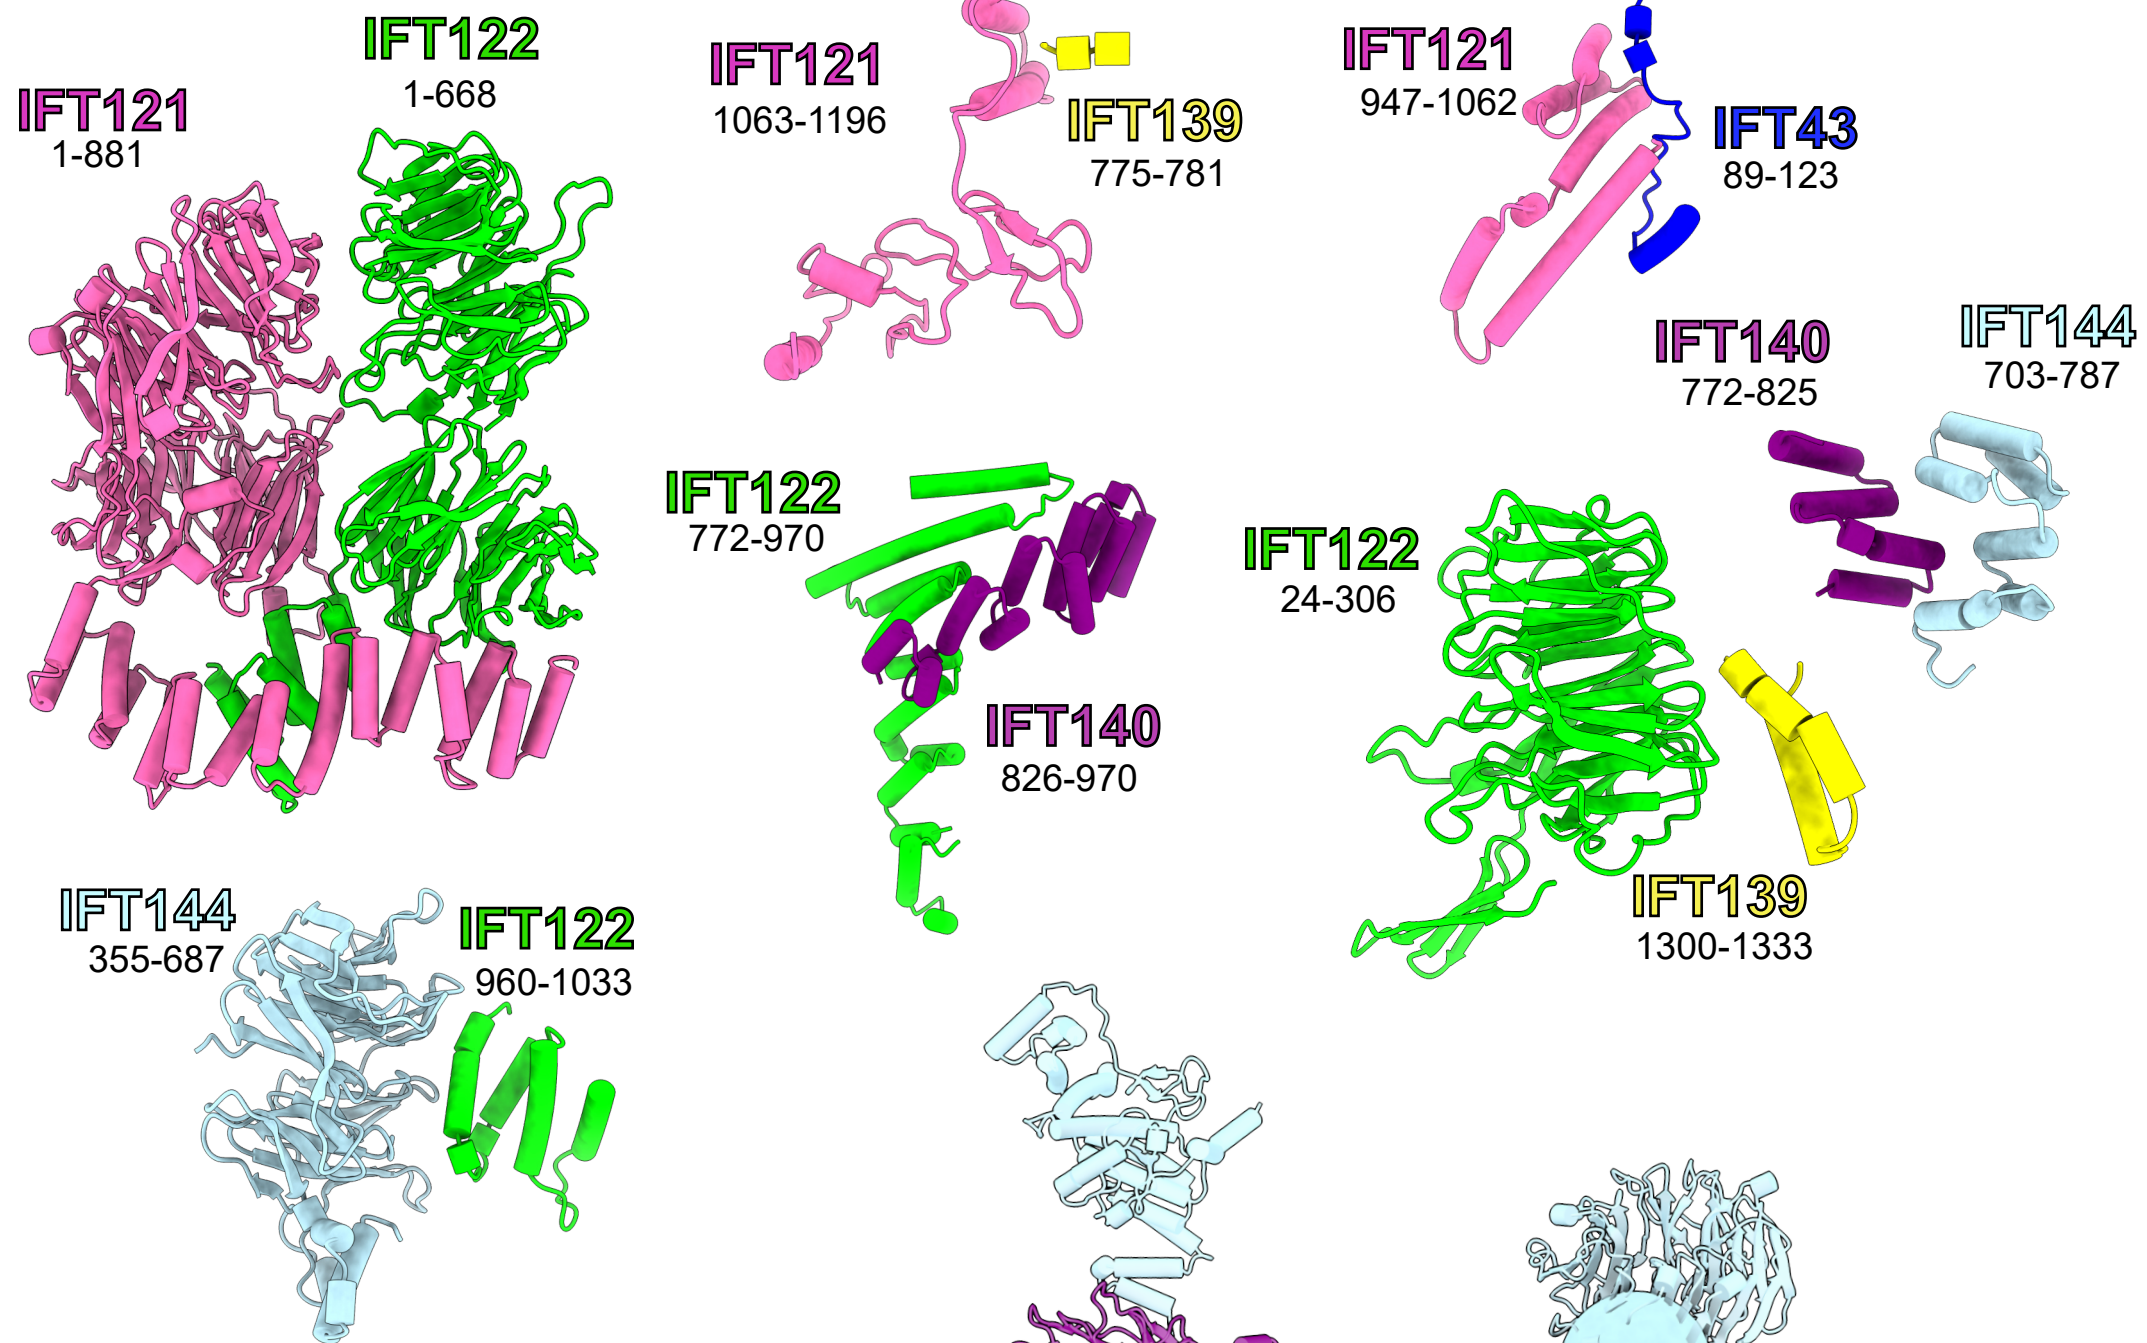**B**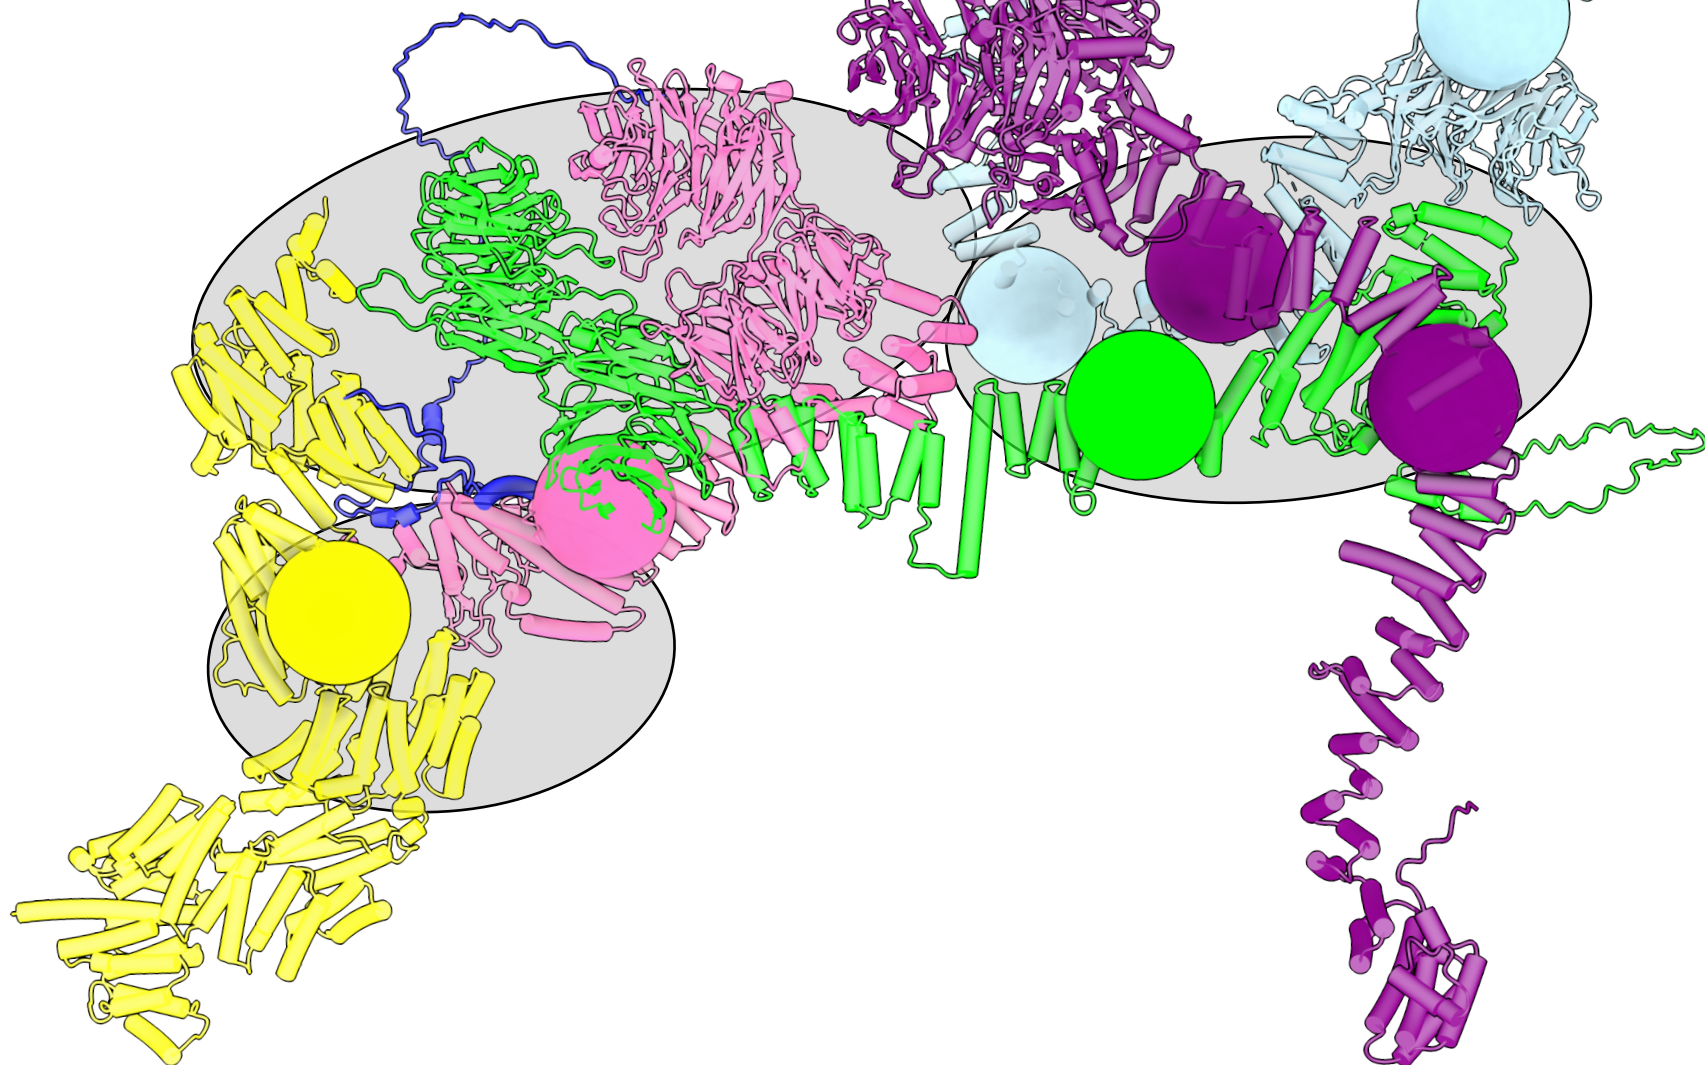

Supplement: supp [file elife-81977-supp-v1.zip › elife_poa_e81977_Figure_2_figure_supplement_2.pdf]

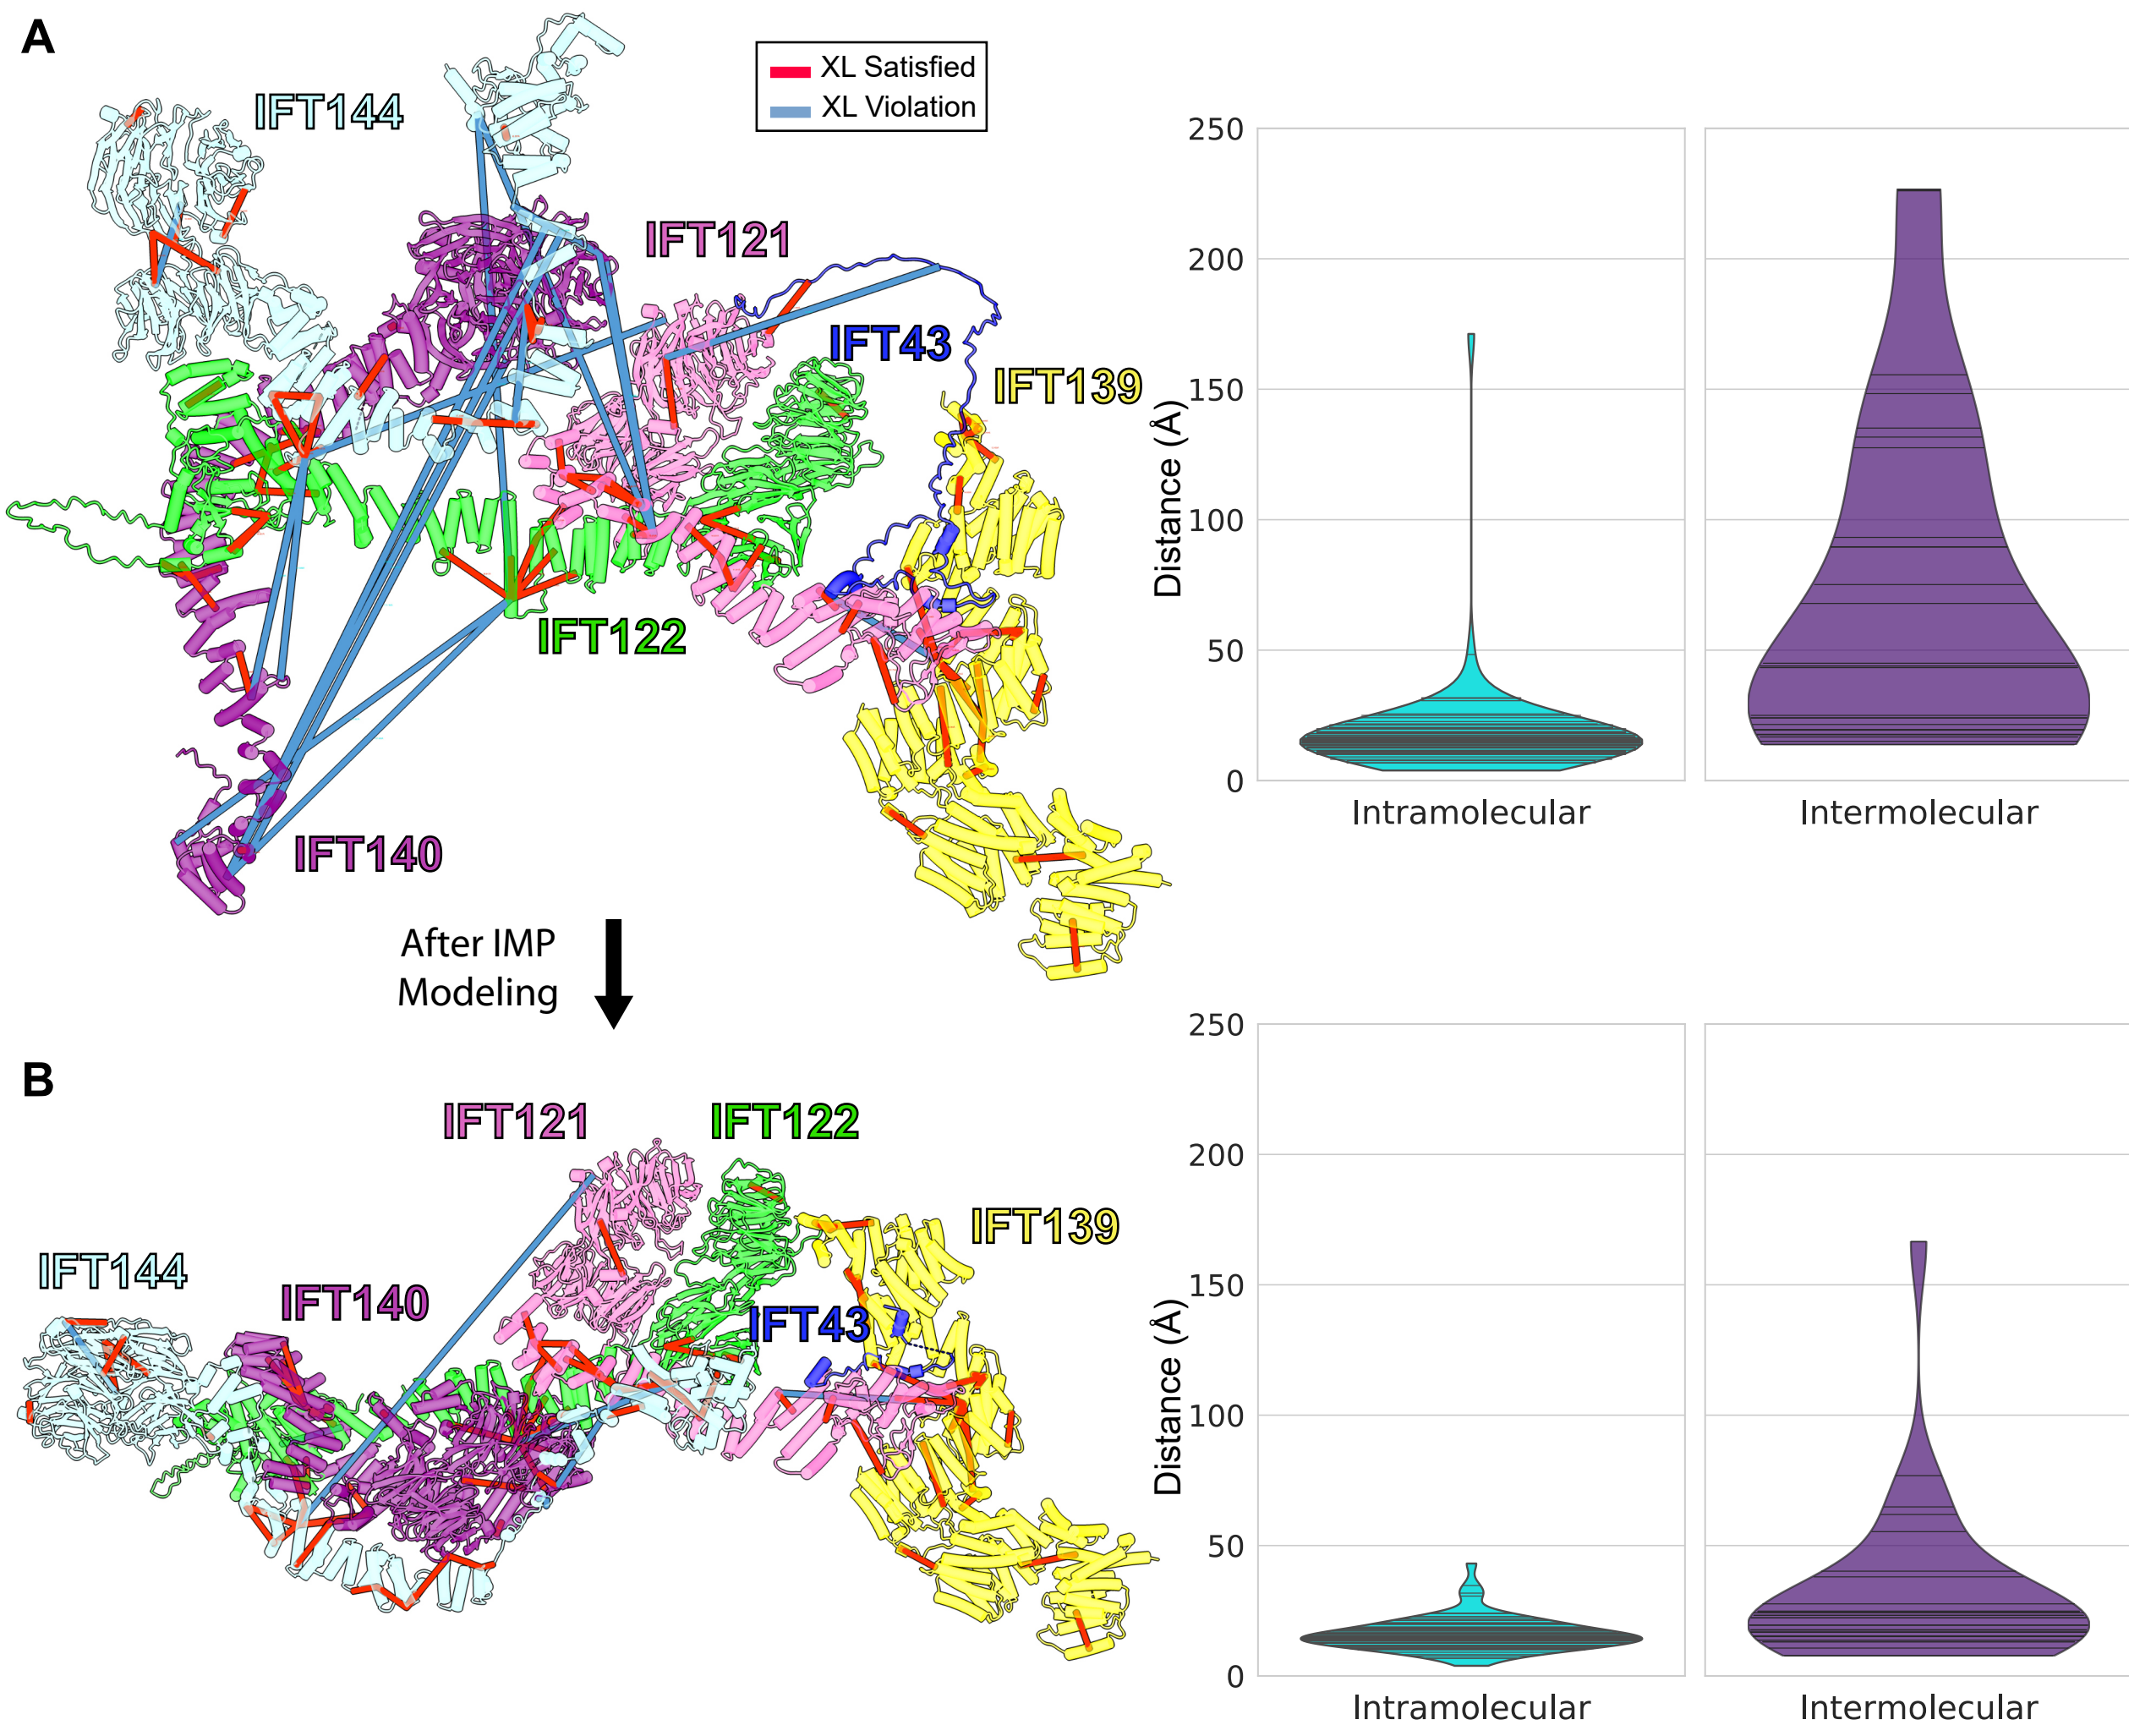

Supplement: supp [file elife-81977-supp-v1.zip › elife_poa_e81977_Figure_2_figure_supplement_4.pdf]

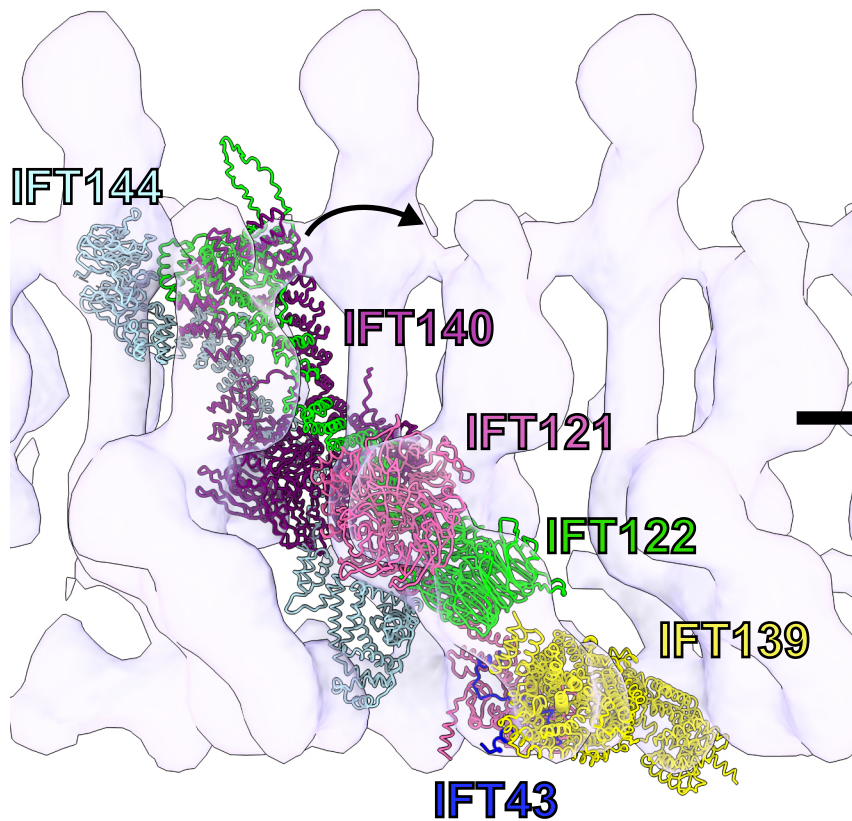

Initial model

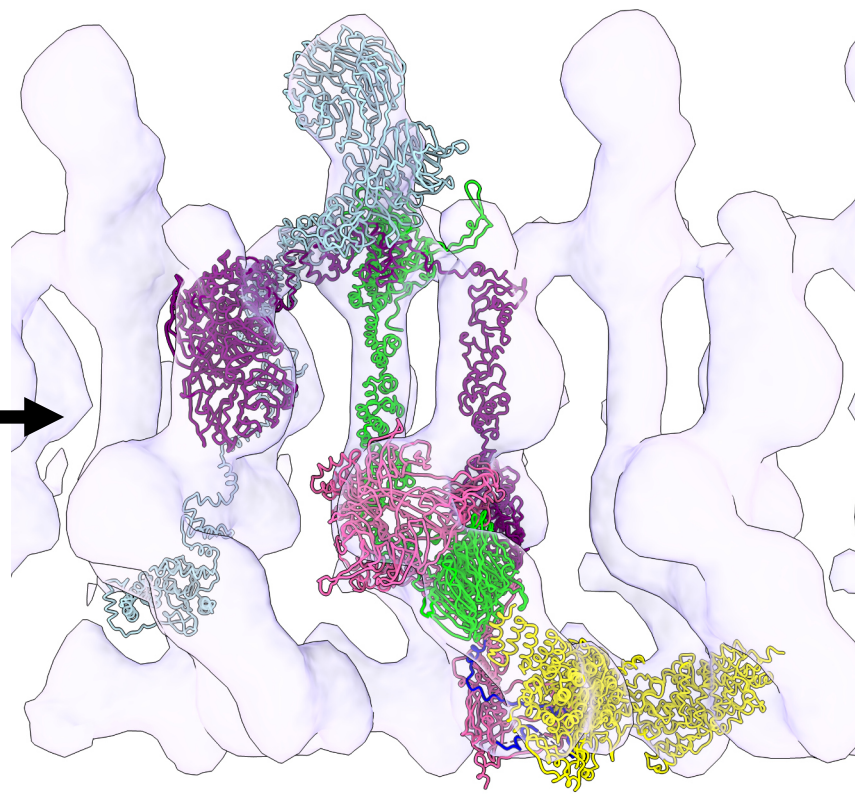

Final model

Supplement: supp [file elife-81977-supp-v1.zip › elife_poa_e81977_Figure_4_figure_supplement_1.pdf]

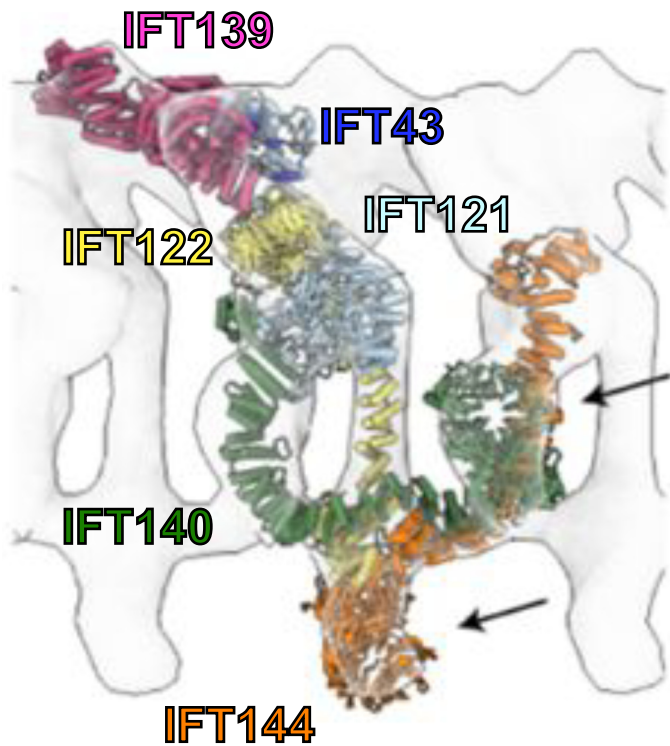

Hesketh, Mukhopadhyay *et al.*, Fig. 5C

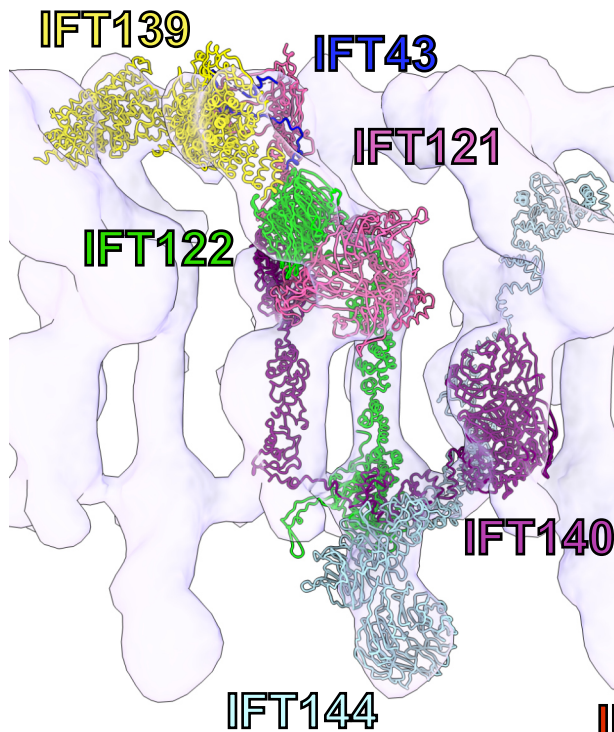

This study

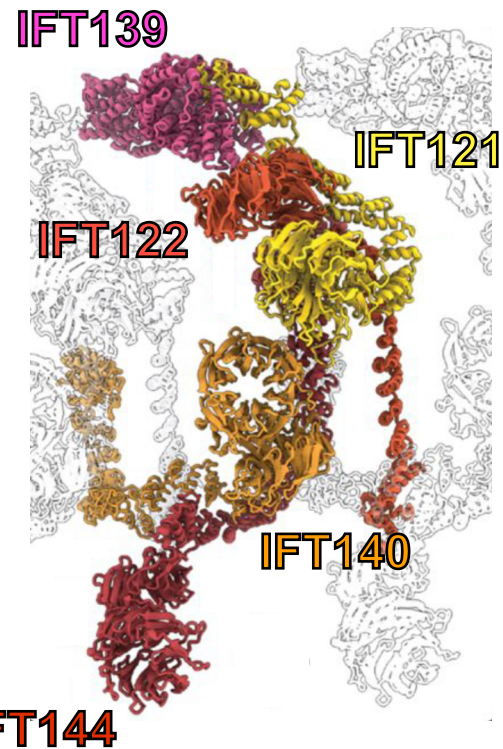

Lacey *et al.*, Fig. 4C

Supplement: supp [file elife-81977-supp-v1.zip › elife_poa_e81977_Figure_4_figure_supplement_2.pdf]

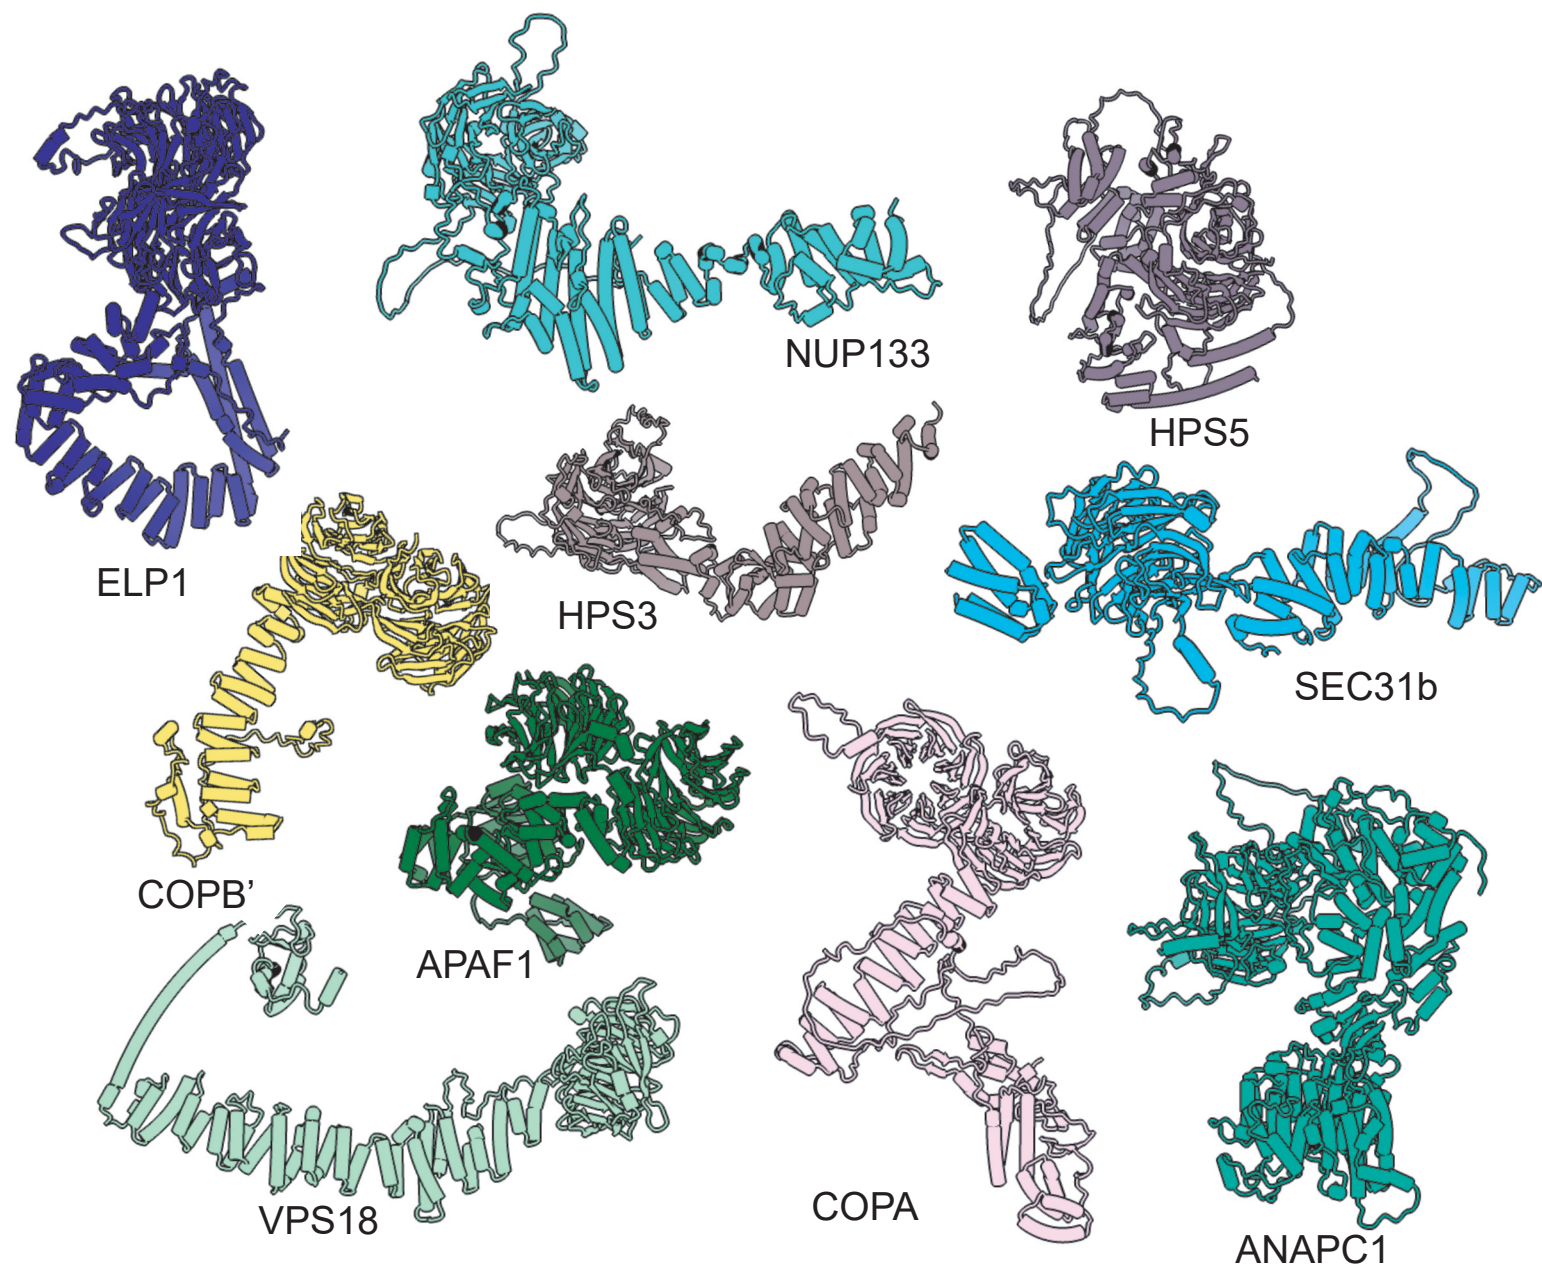

Supplement: supp [file elife-81977-supp-v1.zip › elife_poa_e81977_Figure_6_figure_supplement_1.pdf]
